# Supplementary material for: The efficacy of a novel porcine-derived collagen membrane on guided bone regeneration: A comparative study in canine model
Source: Research Square preprint supplement (doi:10.21203/rs.3.rs-4543229/v1), 2024-06-25
Supplement: Supplementary file 3 [file 7f5d5e3200b14493d7e21223.docx]

*
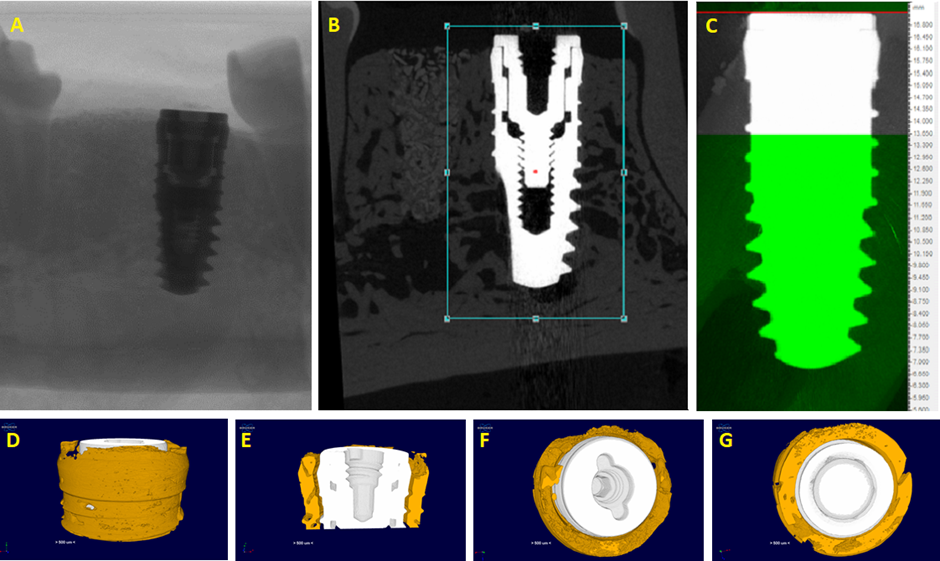
*

Supplementary Figure 1.MicroCT assessment of bone formation around the defect-implant site. (A) X-ray image, 9µm voxels; (B) Vertical re-alignment of the implant in μCT dataset. (C) Selected ROI (white) based on implant landmarks.
