# Supplementary material for: The efficacy of a novel porcine-derived collagen membrane on guided bone regeneration: A comparative study in canine model
Source: Research Square preprint supplement (doi:10.21203/rs.3.rs-4543229/v1), 2024-06-25
Supplement: Supplementary file 4 [file dc220d68eb089eb31c04f771.docx]

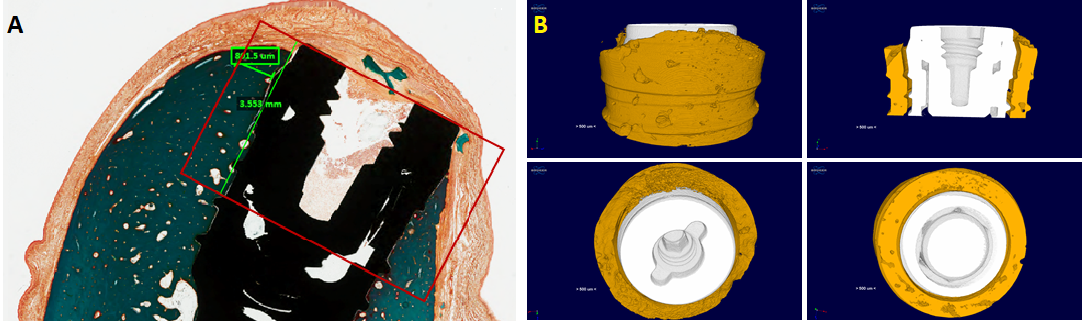


**Supplementary Figure 2.** The region of interest (ROI) for static histomorphometry was defined by selecting a regular box of 3.55mm height from the implant apex with a diameter of 0.8mm, no offset from the bone surface to the dental implant was selected.
